# Supplementary material
Source: MDPI journal article supplement (https://www.mdpi.com/2311-7524/9/2/153)
Supplement: s1 [file s1]

Article title: Standardization of an *in vitro* seed germination protocol compared to acid scarification and cold stratification method for different raspberry genotypes

Authors: Valeria Pergolotti, Micol Marcellini, Elida Contreras, Bruno Mezzetti, Marina Gambardella, Franco Capocasa and Silvia Sabbadini

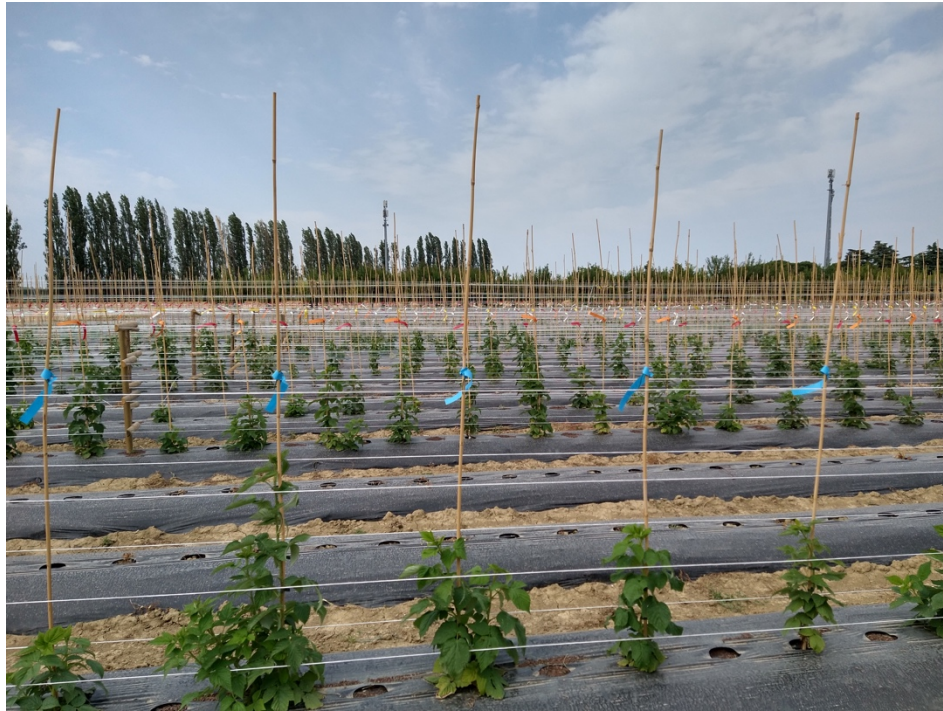

**Supplementary Figure S1.** Raspberry plants belonging from *in vitro* germinated seeds by following “bt2” treatment (seed cut in half placed directly at 24°C), after two months of cultivation in the open field in Cesena (FC) Italy, located at 44°09'39.3"N latitude 12°14'29.8"E longitude.
